# Supplementary material for: Interfacial engineering of a bifunctional electrocatalyst with outstanding catalytic performance, high intrinsic activity and solar-to-hydrogen conversion efficiency
Source: Royal Society of Chemistry journal article supplement (doi:10.1039/d4se01320d), 2024-11-29
Supplement: d4se01320d4.pdf [file d4se01320d4.pdf]

## Electronic Supplementary Information

### **Investigating Interfacial Engineering of Bifunctional Electrocatalyst: Outstanding Catalytic Performance, High Intrinsic Activity and Solar to Hydrogen Conversion Efficiency**

**Muthukumaran Sangamithirai<sup>a</sup>, Murugan Vijayarangan<sup>a</sup>, Murugan Muthamildevi<sup>a</sup>, Venkatachalam Ashok<sup>a</sup> and Jayaraman Jayabharathi<sup>a\*</sup>**

*<sup>a</sup>Department of Chemistry, Material Science Lab, Annamalai University, Annamalai Nagar, Tamil Nadu-608 002, India*

*\*Email id: jtchalam2005@yahoo.co.in*

#### **Contents**

**SI-I: Experimental Section**

**SI-II: Figures**

**SI-III: Calculations**

**SI-IV: Tables and reference**

## **SI-I: Experimental Section**

### **Materials and Methods**

Glucose ( $C_6H_{12}O_6$ ), KOH, and 2-propanol, each with 97-99% purity, were obtained from SDFCL chemicals, while sodium bicarbonate ( $NaHCO_3$ ) and cobalt nitrate ( $Co(NO_3)_2 \cdot 6H_2O$ ), each with 99% purity, were sourced from Sigma-Aldrich. All reagents were used directly without additional purification, and deionized water was used throughout the experiment.

### **Characterization of an electrocatalyst**

The morphologies and chemical compositions of catalyst samples were determined by scanning electron microscope (JEOL-JSM-IT 200) connected with an energy-dispersive X-ray spectrometer applying the 20 kV acceleration voltage. HR-TEM JOEL, JAPAN was used to record transmission electron microscope (TEM) images of the nanomaterials and selected area electron diffraction (SAED) pattern. The powder X-ray diffraction (XRD) investigated the crystal structures on a POWER-XRD EQUINOX-1000 diffractometer with Cu  $K\alpha$  radiation ( $\lambda=1.54056 \text{ \AA}$ ). Furthermore, to determine the chemical states and compositions of catalyst samples, XPS (X-ray photoelectron spectroscopy) with a K-Alpha-KAN9954133 spectrometer (micro-focused monochromator with variable spot size), Raman spectra were registered on Invia Reflex Raman Microscope with Spectrometer and surface area and pore size measurements were analysed by the Micromeritics ASAP 2020 instrument at a temperature of 77 K.

### **Electrode preparation and characterization**

All electrochemical measurements were carried out on a Biologic SP-300 Potentiostat electrochemical workstation, the linear sweep voltammograms (LSV) test was carried out in 1 M KOH electrolyte with a scan rate of 5 mV/s three-electrode setup. To prepare catalyst

ink, 5.0 mg of the as-prepared ID-CoMo, CoO, MoO electrocatalyst, and 30  $\mu$ L Nafion (5 wt%) was evenly dispersed in 0.5 mL of propanol, and then the as-obtained solution was treated with ultrasound for 20 min. For comparison, a 0.005 mg/ml commercial IrO<sub>2</sub> and Pt/C suspension was made using a comparable methodology. The as-prepared catalyst ink was smeared onto Ni foam and dried at 60 °C for 12 h in a vacuum oven. Before coating, the NF was washed with acetone, HCl aqueous solution, deionized water and ethanol in sequence. In a three-electrode setup nickel foam (NF) as the working electrode, Ag/AgCl (3 M KCl) as reference electrode, and a platinum wire as counter electrode. Measured potentials were referred to the reversible hydrogen electrode (RHE)  $E_{(RHE)} = E_{(Hg/HgO)} + 0.923 \text{ V}$ . The resistances of ID-CoMo electrocatalysts were acquired from EIS tests at the overpotential of different mV (vs. RHE) in the frequency scope of 100 kHz to 10 mHz. The durability of RCoFe was tested by cyclic voltammetry (CV) and current-time (i-t) curve tests.

## SI-II: Figures

Figure S1: (a) Photographs of Mechanochemical method and (b) Photographs of combustion method

## (a) Mechanochemical Reaction

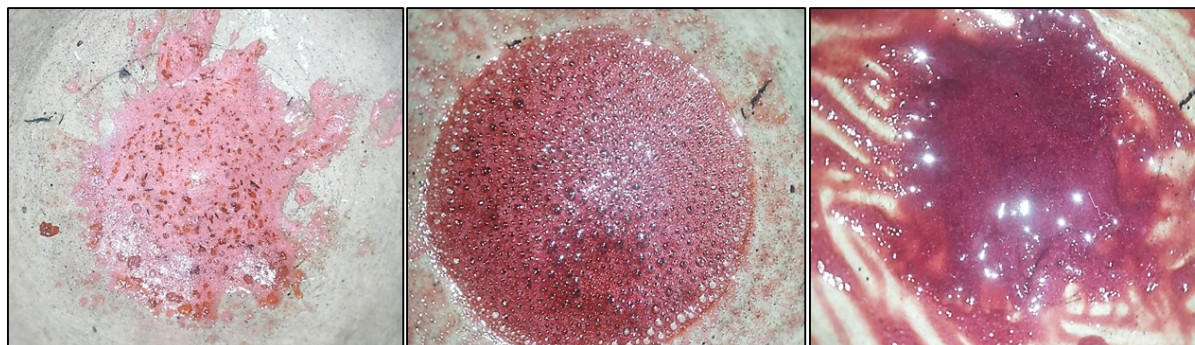

**Begin to grind**  
**Frizzy and Foamy**

**After 5 mins**  
**Releasing CO<sub>2</sub> and H<sub>2</sub>O**

**After 15 mins**  
**Homogenous mixture**

## (b) Combustion Reaction

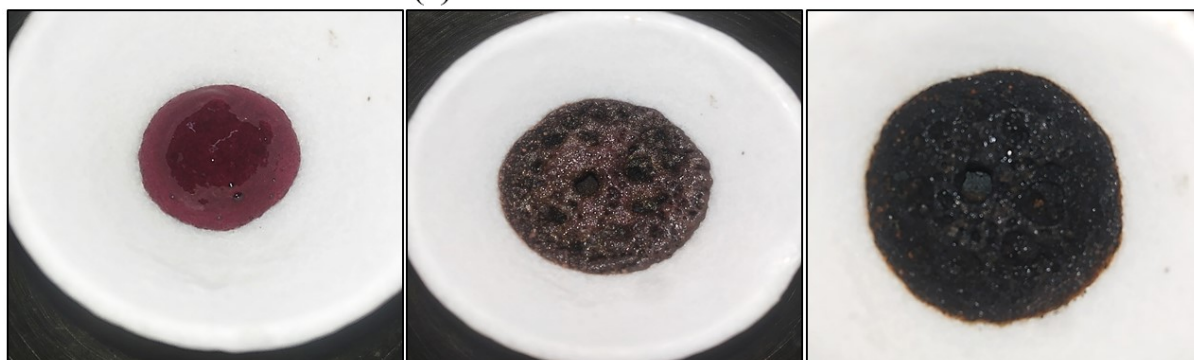

**Begin to Combust**

**After 5mins**  
**release of Co<sub>2</sub> created airpockets**

**Fully combust**

Figure S2: Raman spectra (a) CoO and (b) carbon

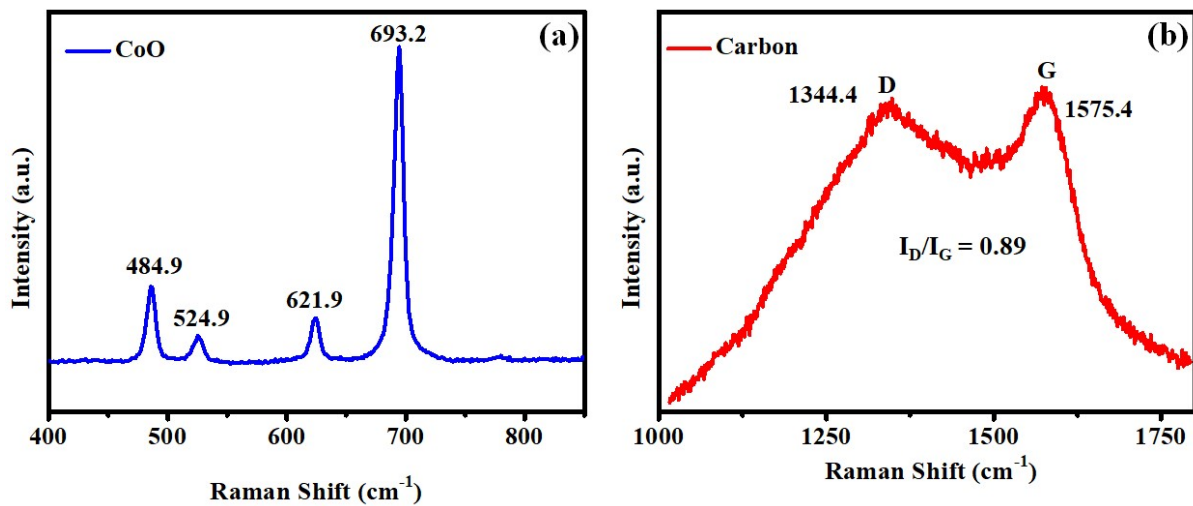

**Figure S3: (a) Overall all view of elemental mapping (inset: field of view image); (b, c, d) Elemental mapping O, Co, C and (e) Energy dispersive x-ray spectra (inset: % table)**

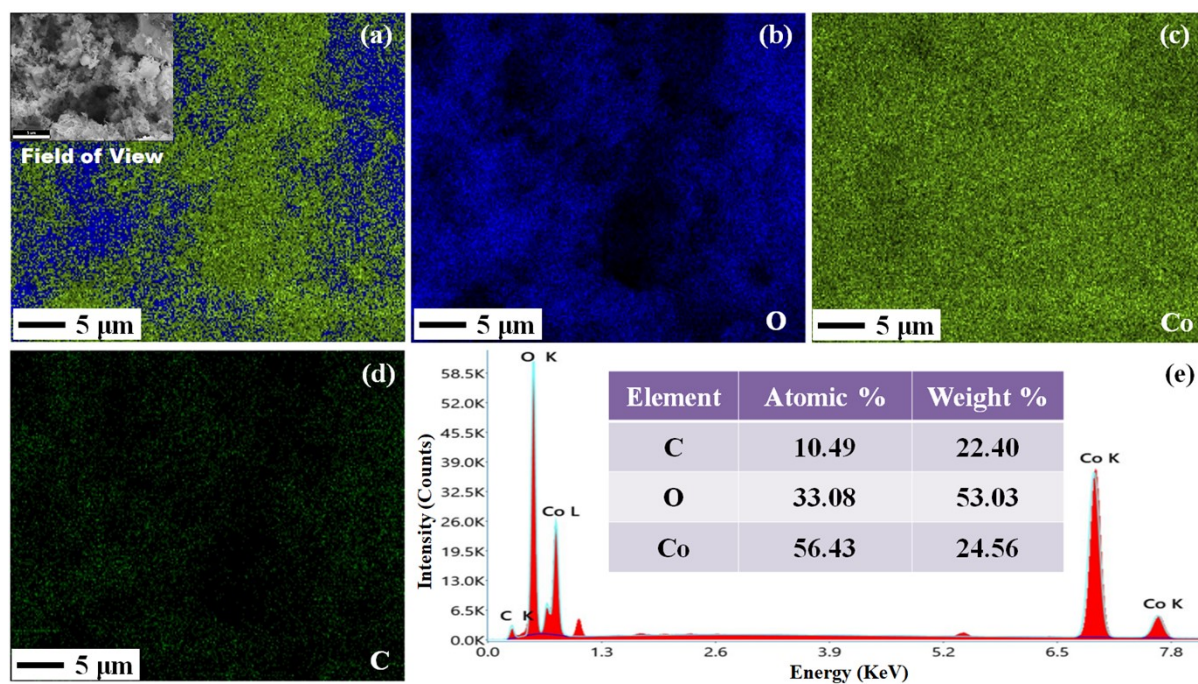



Figure S4: (a) Porous view in HR-TEM image; (b) Carbon wrapper with core shell interface and (c) Selected area diffraction pattern

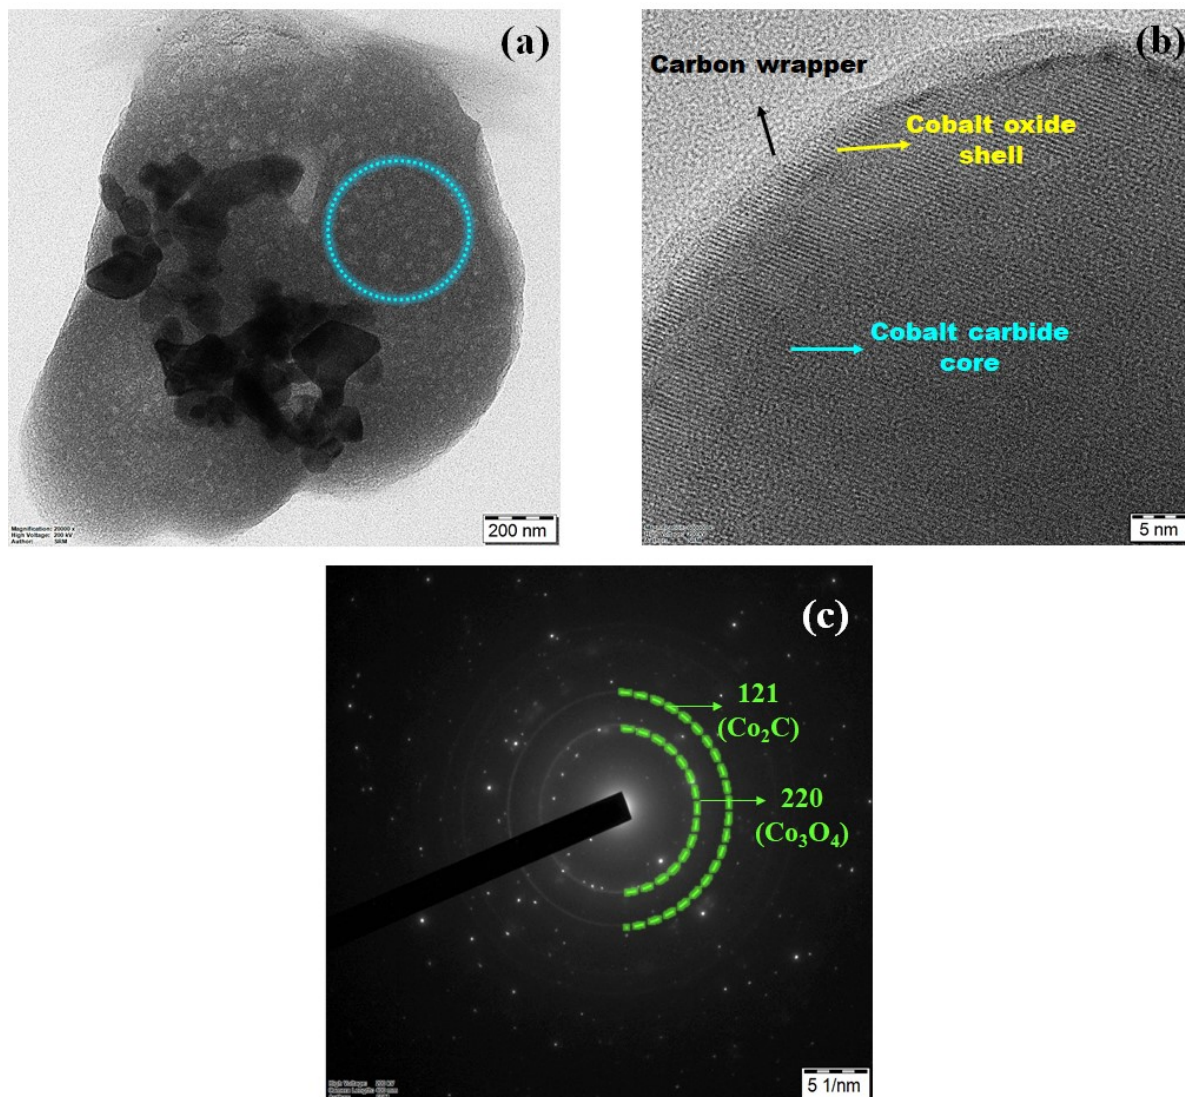

**Figure S5: Different molar concentration of KOH for Co-O-C/CPs**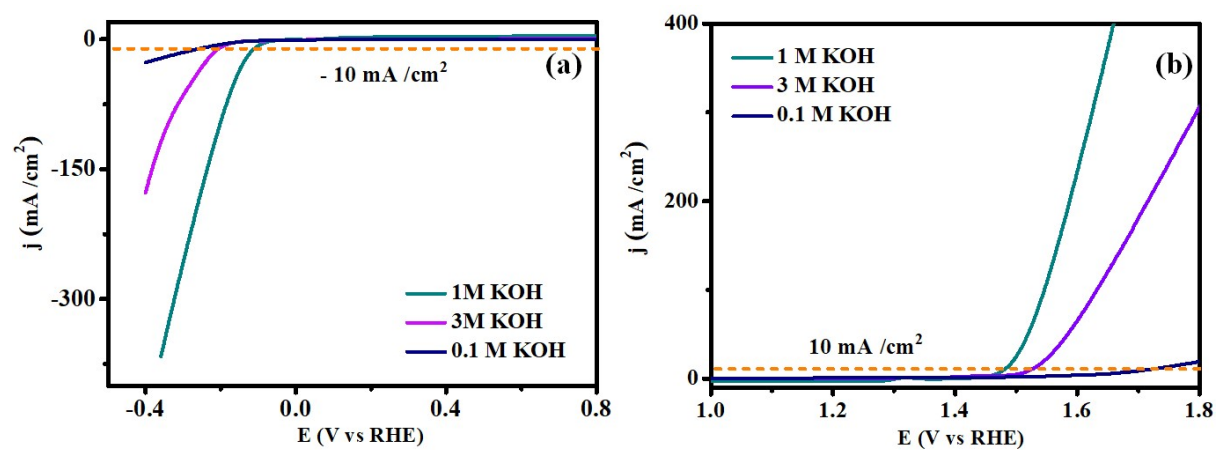



Figure S6: Electrochemical Performance of Carbon-Based Counter Electrodes

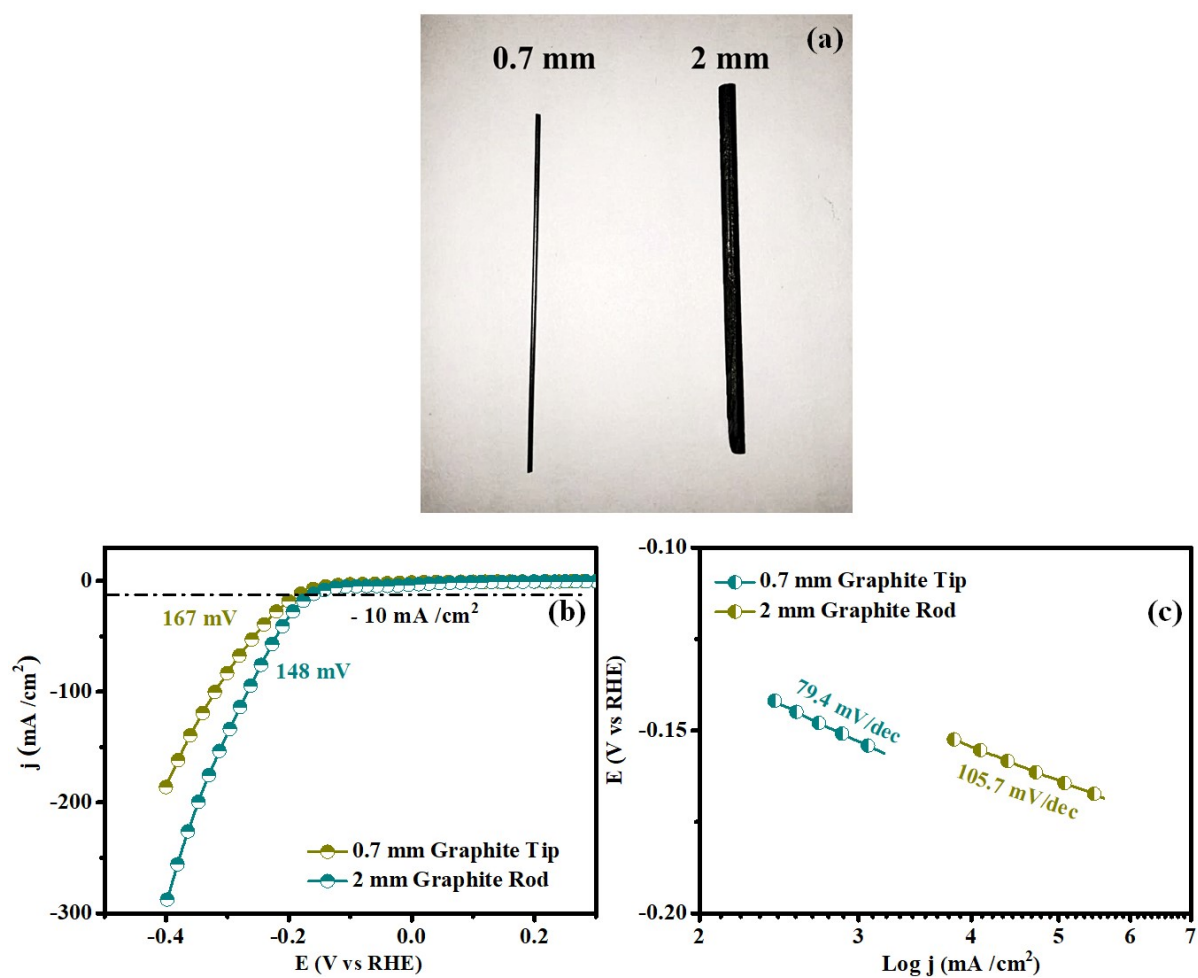

**Figure S7: Electrochemical active surface area: (a) Co-O-C/CPs; (b) CoO; (c) carbon and (d) bare NF**

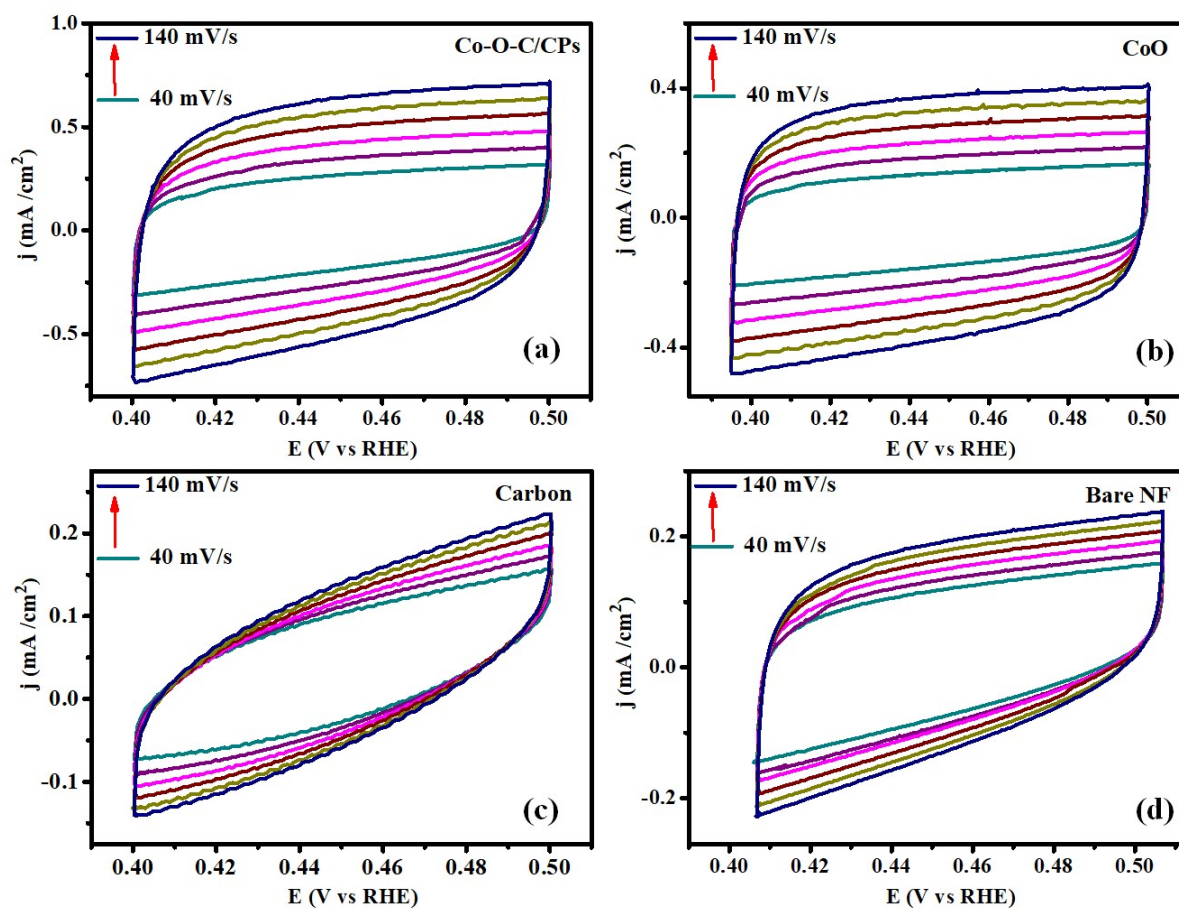

**Figure S8: Turnover frequency values in radar view**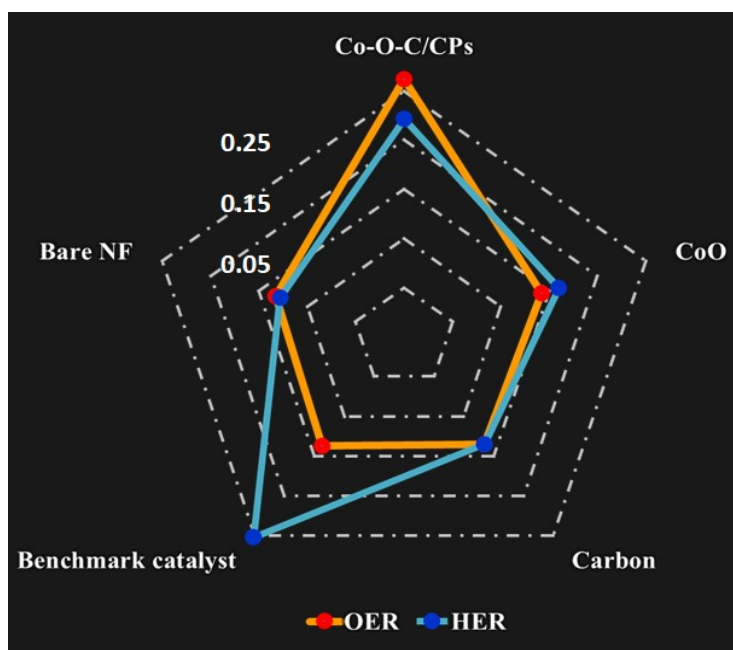

**Figure S9: General solar cell water splitting setup**

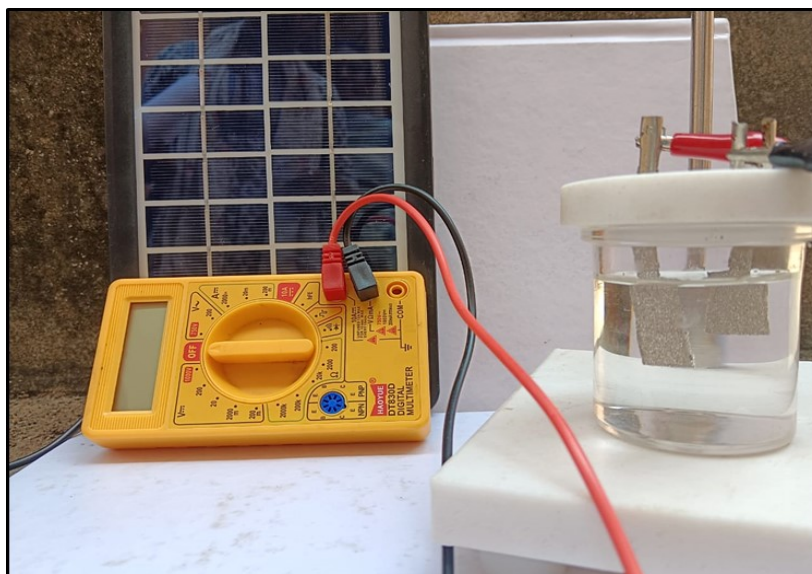

**Figure S10: Field emission scanning electron microscope after OER of Co-O-C/CPs: (a) Catalyst strongly binds in NF; (b) embedded morphology; (c) Elemental mapping and (d) EDS spectra**

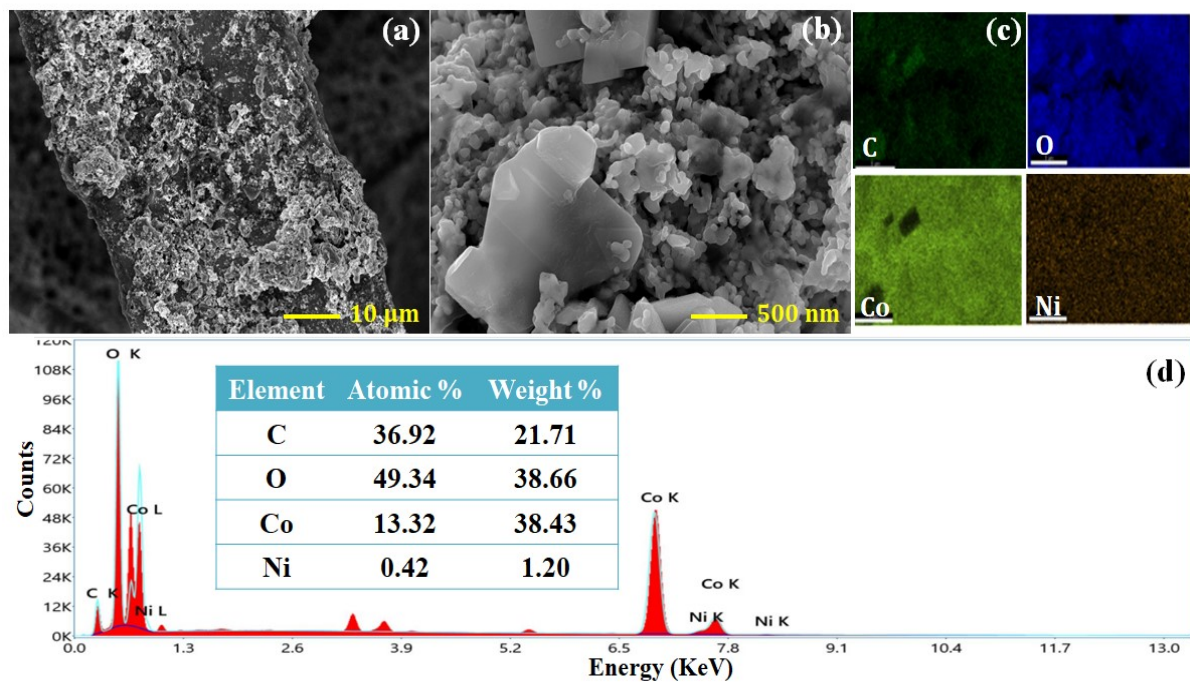

**Figure S11: Field emission scanning electron microscope after HER of Co-O-C/CP: (a) Catalyst strongly binds in NF; (b) embedded morphology; (c) Elemental mapping and (d) EDS spectra**

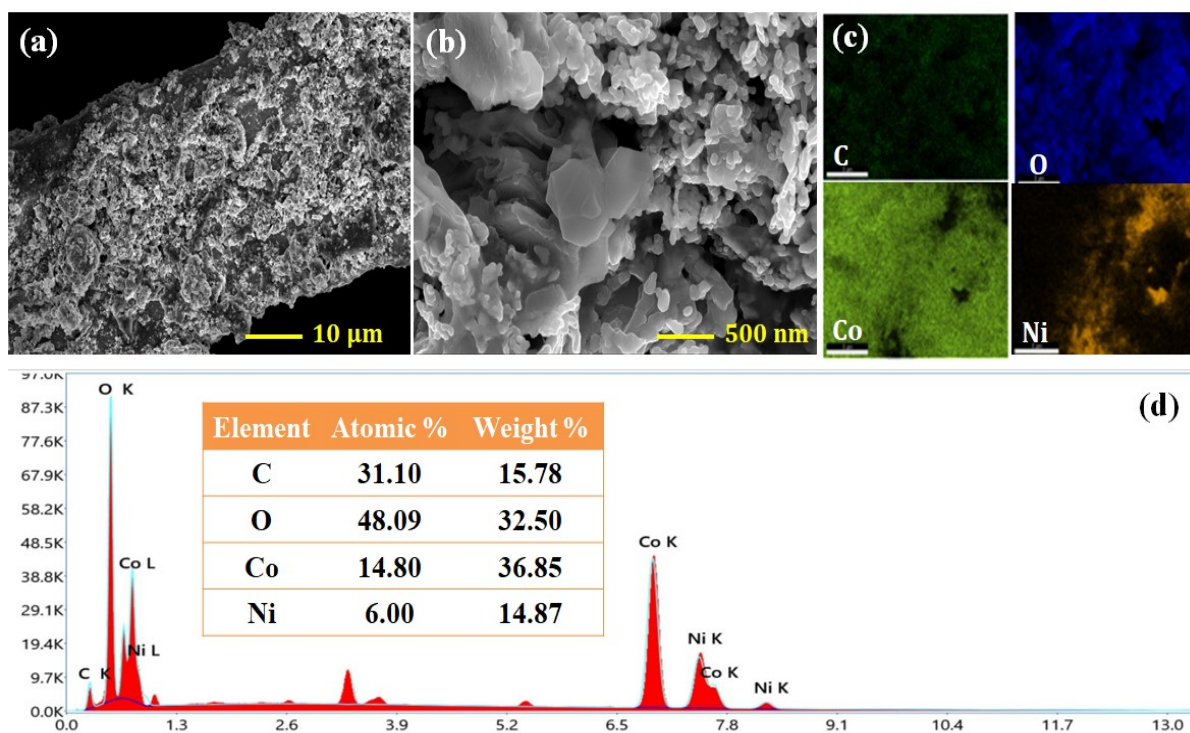



**Figure S12: XRD of Co-O-C/CPs after OER and HER**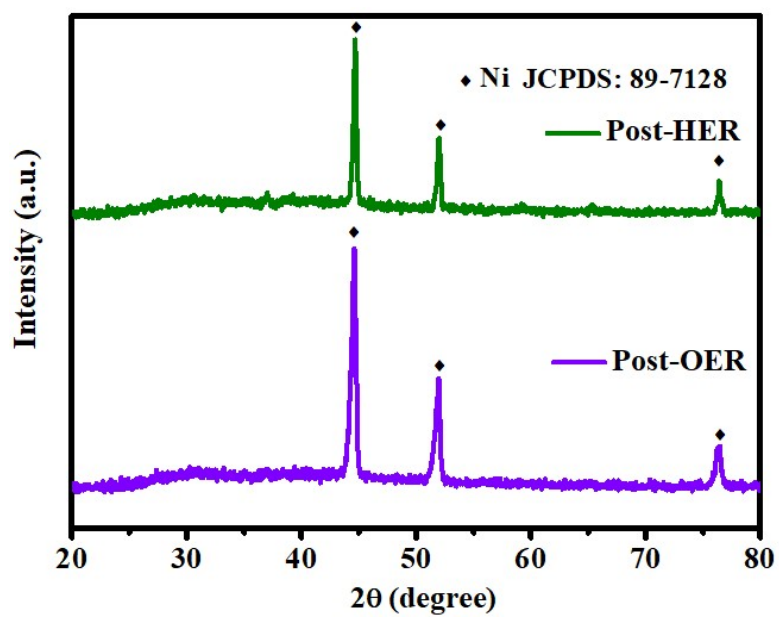

**Figure S13: Post XPS of Co-O-C/CPs: (a) Co 2p after OER and (b) Co 2p after HER**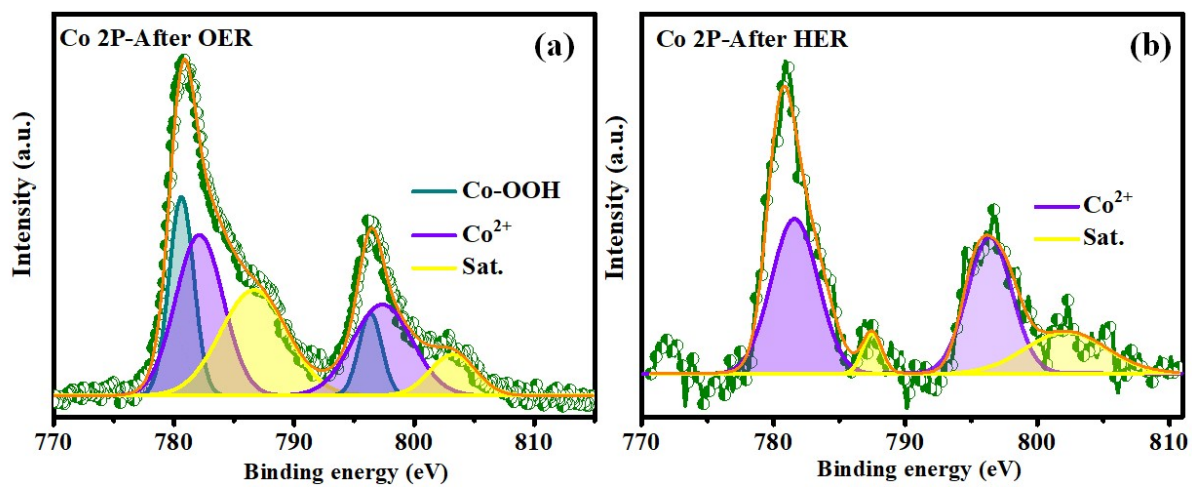

**Figure S14: Post XPS of Co-O-C/CPs: (a) C 1s after OER and (b) C 1s after HER**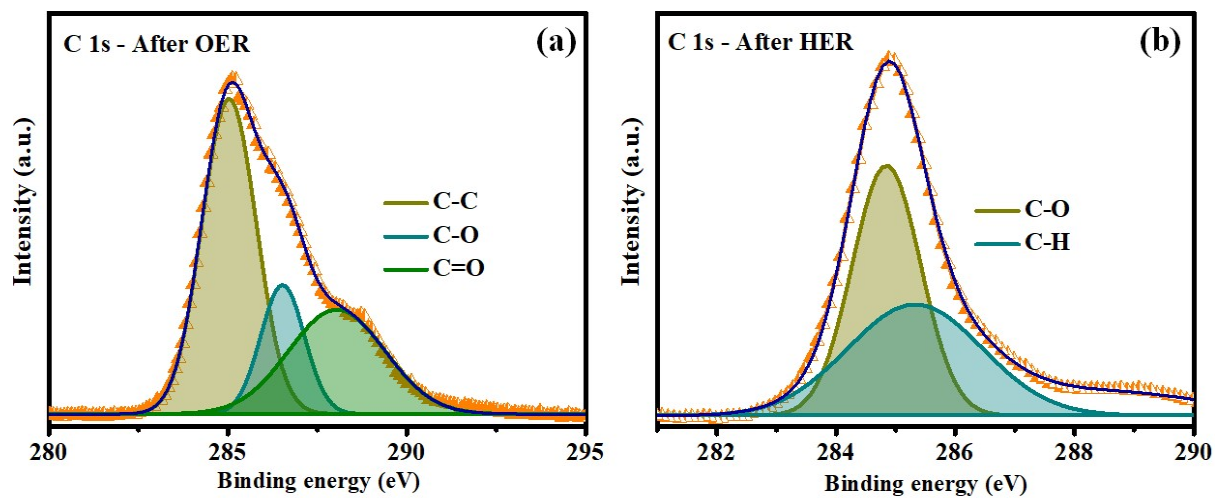

Figure S15: Post XPS of Co-O-C/CPs: (a) O 1s after OER and (b) O 1s after HER

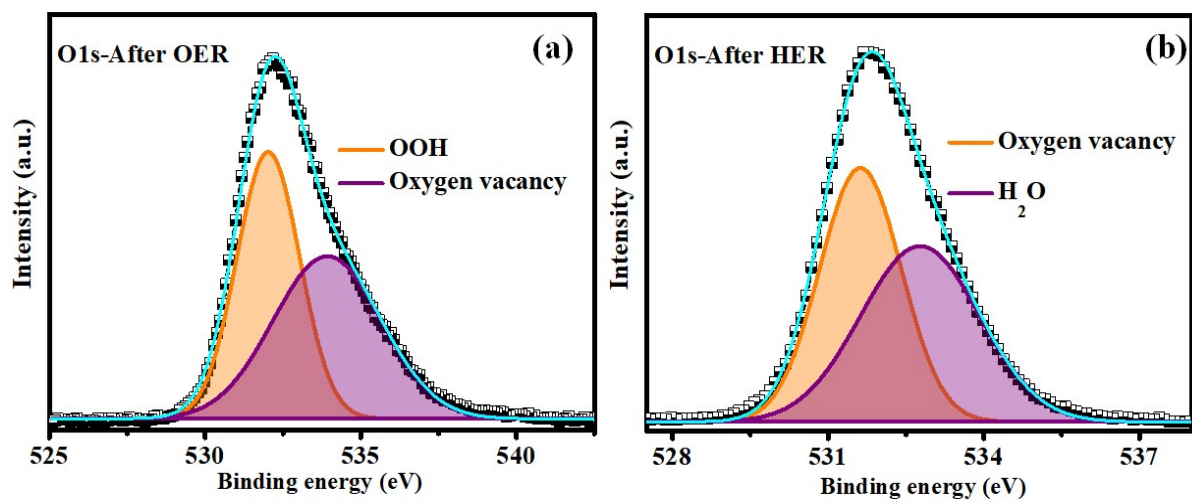

### SI-III: Calculations

#### SI. C1. Energy calculation

$$\begin{aligned} \text{Amount of energy released} &= \text{combustion of glucose} * \text{no. of moles of glucose burned} \\ &= 2808 \text{ kJ} * 0.00556 \\ &= 156.12 \text{ kJ.} \end{aligned}$$

#### SI:C2. Scherrer equation

$$D_{hkl} = 0.9 \lambda / (\beta_{hkl} \cos \theta)$$

where  $D_{hkl}$  - crystallite size,  $\lambda$  - X-ray wavelength (Cu,  $K\alpha_1$ ),  $\theta$  - diffraction angle, and  $\beta_{hkl}$  - full width at half maximum of the diffraction peak.

#### SI. C3. Tafel equation

$$\eta = a + b \log J,$$

where  $\eta$  is the overpotential (V vs. RHE),  $b$  the Tafel slope, and  $j$  the corresponding current density (mA /cm<sup>2</sup>) as well as the Tafel constant

#### SI. C4. ECSA calculation

The capacitive currents are measured in a potential range where no faradic processes occur. The sweep potential is between 0.40 to 0.50 V vs. RHE at different scan rates (40, 60, 80, 100, 120 and 140 mV s<sup>-1</sup>). The differences in current density variation ( $\Delta j = j_a - j_c$ ) at the potential of 0.45 V vs. RHE plotted against scan rate are fitted to estimate the electrochemical double layer capacitances ( $C_{dl}$ ), which are used to estimate the electrochemical surface area (ECSA).

$$ECSA = C_{dl} / C_s$$

Where double layer capacitance is  $C_{dl}$  and specific capacitance is  $C_s$ , and 40  $\mu\text{F cm}^{-2}$  is a constant to convert capacitance to ECSA. The specific capacitance can be converted into an electrochemical active surface area (ECSA) using the specific capacitance value for a flat standard with 1 cm<sup>2</sup> of real surface area.

### SI. C5. Turnover frequency (TOF) calculation

The TOF is defined as the number of H<sub>2</sub> or O<sub>2</sub> molecules evolved per site per second

$$\text{TOF of O}_2 \text{ or H}_2 = \frac{J * A}{z * f * n}$$

where, J- Current density (mA/cm<sup>2</sup>), A- Geometric surface area of the working electrode, z - no. of electrons involved in the OER and HER process, F- Faraday Constant (96485.3 C mol<sup>-1</sup>) and n- The number of moles of active sites on the electrode.

### SI. C6. Faradaic efficiency

Faradaic efficiency of Co-O-C/CPs was calculated by dividing the amount of the experimentally generated gas by the theoretical amount of gas which is calculated by the charge passed through the electrode:

Faradic efficiency (%)

$$= \frac{\text{(Number of moles of gas produced experimentally for a certain time)} * 100}{\text{Theoretically calculated gas production (in mole) for the same time}}$$

The theoretical amount of gas (O<sub>2</sub> and H<sub>2</sub>) was calculated from accumulated charge during galvanostatic electrolysis by assuming 100% faradic efficiency. Theoretical amount (n in mole) of gas (H<sub>2</sub>, O<sub>2</sub>) = Q / (n \* F) = (I \* t) / (n \* F) where Q is the summation of the charge passed through the electrodes, n is the number of electrons which is 2 for HER and 4 for OER and F is the Faraday constant (96485.3 C.mol<sup>-1</sup>).



### SI. C7. Calculation of hydrogen generation

Based on the displaced amount of water due to the hydrogen bubbles, the amount of hydrogen generated was calculated using the below relationships.

$$\text{Amount of hydrogen generated in 1 h} = \text{amount of water displaced in litres} \quad (1)$$

$$\text{Amount of hydrogen generated in moles for 1 h} = \frac{\text{Amount of water displaced (litres)}}{22.4 \text{ litres}} \quad (2)$$

We also calculated the hydrogen generation rate from the electrical charge passed through the electrode using the equation given below.

$$\left( \begin{array}{c} \text{Current obtained during} \\ \text{water electrolysis} \end{array} \right) \times \left( \begin{array}{c} \text{Time duration for} \\ \text{each potential} \end{array} \right) = \text{Coulomb} \quad (3)$$

$$\frac{\text{Coulomb} \times F}{96485 \text{ C}} = \text{No. of moles of } e^- \text{ for } H_2 \text{ generation} \quad (4)$$

$$\frac{\text{No. of moles of electron for } H_2 \text{ generation} \times 1 \text{ mole of } H_2 \text{ gas}}{2 \text{ moles of electron}} = \text{Moles of Hydrogen generated} \quad (5)$$

## SI-IV Tables and reference

SI: T1- Comparison of HER performance of Co-O-C/CPs with other reported metal carbide electrocatalysts.

| S.No | Catalyst                                                                           | Electrode | $\eta_{10}$ -HER (mV) | Reference                                                        |
|------|------------------------------------------------------------------------------------|-----------|-----------------------|------------------------------------------------------------------|
| 1    | Co-O-C/CPs                                                                         | NF        | 115                   | <b>This work</b>                                                 |
| 2    | Co <sub>3</sub> C-NB                                                               | GCE       | 154                   | <i>J. Mater. Chem. A</i> , 2019, <b>7</b> , 14904-14915          |
| 3    | MoC-Mo <sub>2</sub> C                                                              | GCE       | 120                   | <i>Nano Energy</i> , 2021, <b>90</b> , 106533                    |
| 4    | p-WC <sub>x</sub> NWs                                                              | CC        | 122                   | <i>J. Mater. Chem. A</i> , 2017, <b>5</b> , 13196-13203          |
| 5    | vMoxC                                                                              | GCE       | 116                   | <i>ACS nano</i> , 2020, <b>14</b> , 4988 - 4999.                 |
| 6    | $\alpha$ -Mo <sub>2</sub> C                                                        | GCE       | 160                   | <i>J. Mater. Chem. A</i> , 2015, <b>3</b> , 8361 - 8368.         |
| 7    | Ni-GF/VC                                                                           | NF        | 128                   | <i>Adv. Energy Mater.</i> , 2020, <b>10</b> , 2002260            |
| 8    | Mo <sub>2</sub> C/NC                                                               | GCE       | 148                   | <i>Int. J. Hydrogen Energy</i> , 2018, <b>43</b> , 17244 -17251. |
| 9    | WC@NG/CNT,                                                                         | -         | 253                   | <i>Adv. Funct. Mater.</i> , 2022, <b>32</b> , 2108167            |
| 10   | (Ni <sub>0.2</sub> Co <sub>0.8</sub> ) <sub>6</sub> Mo <sub>6</sub> C <sub>2</sub> | GCE       | 100                   | <i>Mater. Adv.</i> , 2021, <b>2</b> , 336 - 344.                 |
| 11   | W <sub>2</sub> C-HS                                                                | GCE       | 153                   | <i>ACS omega</i> , 2019, <b>4</b> , 4185 - 4191.                 |

**SI: T2- Comparison of OER performance of Co-O-C/CPs with other reported metal carbide electrocatalysts.**

| S.No | Catalyst                                              | Electrode | $\eta_{10}$ -OER (mV) | Reference                                                           |
|------|-------------------------------------------------------|-----------|-----------------------|---------------------------------------------------------------------|
| 1    | Co-O-C/CPs                                            | NF        | 240                   | <b>This work</b>                                                    |
| 2    | Co/Mo <sub>2</sub> C                                  | CC        | 366                   | <i>Int. J. Hydrogen Energy</i> , 2020, <b>45</b> , 21221 - 21231.   |
| 3    | FeNi-Mo <sub>2</sub> C/C                              | GCE       | 288                   | <i>Nano Energy</i> , 2021, <b>88</b> , 106216                       |
| 4    | Co <sub>6</sub> Mo <sub>6</sub> C <sub>2</sub> /NCRGO | GCE       | 260                   | <i>ACS Appl. Mater. Interfaces</i> , 2017, <b>9</b> , 16977 -16985. |
| 5    | CoO <sub>x</sub> @CN                                  | GCE       | 260                   | <i>J. Am. Chem. Soc.</i> , 2015, <b>137</b> , 2688-2694.            |
| 6    | CoP/rGO-400                                           | RDE       | 340                   | <i>Chem. Sci.</i> , 2016, <b>7</b> , 1690 -1695.                    |
| 7    | Ni/Mo <sub>2</sub> C-PC                               | GCE       | 368                   | <i>Chem. Sci.</i> , 2017, <b>8</b> , 968-973.                       |
| 8    | Ni <sub>3</sub> C/C                                   | CFP       | 320                   | <i>Adv. Mater.</i> , 2016, <b>28</b> , 3326 -3332.                  |
| 9    | Fe <sub>3</sub> C@NG <sub>800-0.2</sub>               | RDE       | 361                   | <i>ACS Appl. Mater. Interfaces</i> , 2015, <b>7</b> , 21511-21520.  |
| 10   | NiCo <sub>2</sub> S <sub>4</sub>                      | NF        | 260                   | <i>Adv. Funct. Mater.</i> , 2016, <b>26</b> , 4661-4672.            |
| 11   | Co <sub>3</sub> ZnC/Co@CN                             | GCE       | 366                   | <i>J. Mater. Chem. A</i> , 2016, <b>4</b> , 9204-9212.              |

**SI: T3- Comparison of overall water splitting performance of Co-O-C/CPs with other reported metal carbide electrocatalysts.**

| S.No | Catalyst                                       | Electrode | Cell Potential (V) | Reference                                                           |
|------|------------------------------------------------|-----------|--------------------|---------------------------------------------------------------------|
| 1    | Co-O-C/CPs                                     | NF        | 1.60               | <b>This work</b>                                                    |
| 2    | Mo <sub>2</sub> C@CS                           | GCE       | 1.73               | <i>ChemSusChem</i> , 2017, <b>10</b> , 3540-3546                    |
| 3    | β-Mo <sub>2</sub> C                            | NF        | 1.65               | <i>Electrochim. Acta</i> , 2019, <b>298</b> , 305-312.              |
| 4    | Co <sub>6</sub> W <sub>6</sub> C@NC            | CC        | 1.58               | <i>Small</i> , 2020, <b>16</b> , 1907556                            |
| 5    | Ni/Mo <sub>2</sub> C-PC/NF                     | NF        | 1.66               | <i>Chem. Sci.</i> , 2017, <b>8</b> , 968-973.                       |
| 6    | Ni-Mo <sub>x</sub> C/NC-100                    | GCE       | 1.72               | <i>ACS Appl. Mater. Interfaces</i> , 2018, <b>10</b> , 35025-35038. |
| 7    | NiCo <sub>2</sub> N                            | NF        | 1.70               | <i>ChemSusChem</i> , 2017, <b>10</b> , 4170-4177.                   |
| 8    | Co <sub>6</sub> Mo <sub>6</sub> C <sub>2</sub> | GCE       | 1.81               | <i>Chem. Eur. J.</i> , 2020, <b>26</b> , 4157-4164.                 |
| 9    | Co/W-C@NCNSs                                   | GCE       | 1.68               | <i>Nano Energy</i> , 2019, <b>57</b> , 746-752.                     |
| 10   | Co-NC@Mo <sub>2</sub> C                        | GCE       | 1.685              | <i>Green Energy and Technology</i> , 2019, 539                      |
| 11   | Ni <sub>3</sub> ZnCo <sub>0.7</sub> /NCNT      | NF        | 1.66               | <i>Carbon</i> , 2019, <b>148</b> , 496-503.                         |
